# Supplementary material for: A context-dependent bifurcation in the Pointed transcriptional effector network contributes specificity and robustness to retinal cell fate acquisition
Source: PubMed Central journal article supplement (PMC7728396; doi:10.1371/journal.pgen.1009216), 2020-11-30
Supplement: pgen.1009216.s001.pdf [file pgen.1009216.s001.pdf]

**A**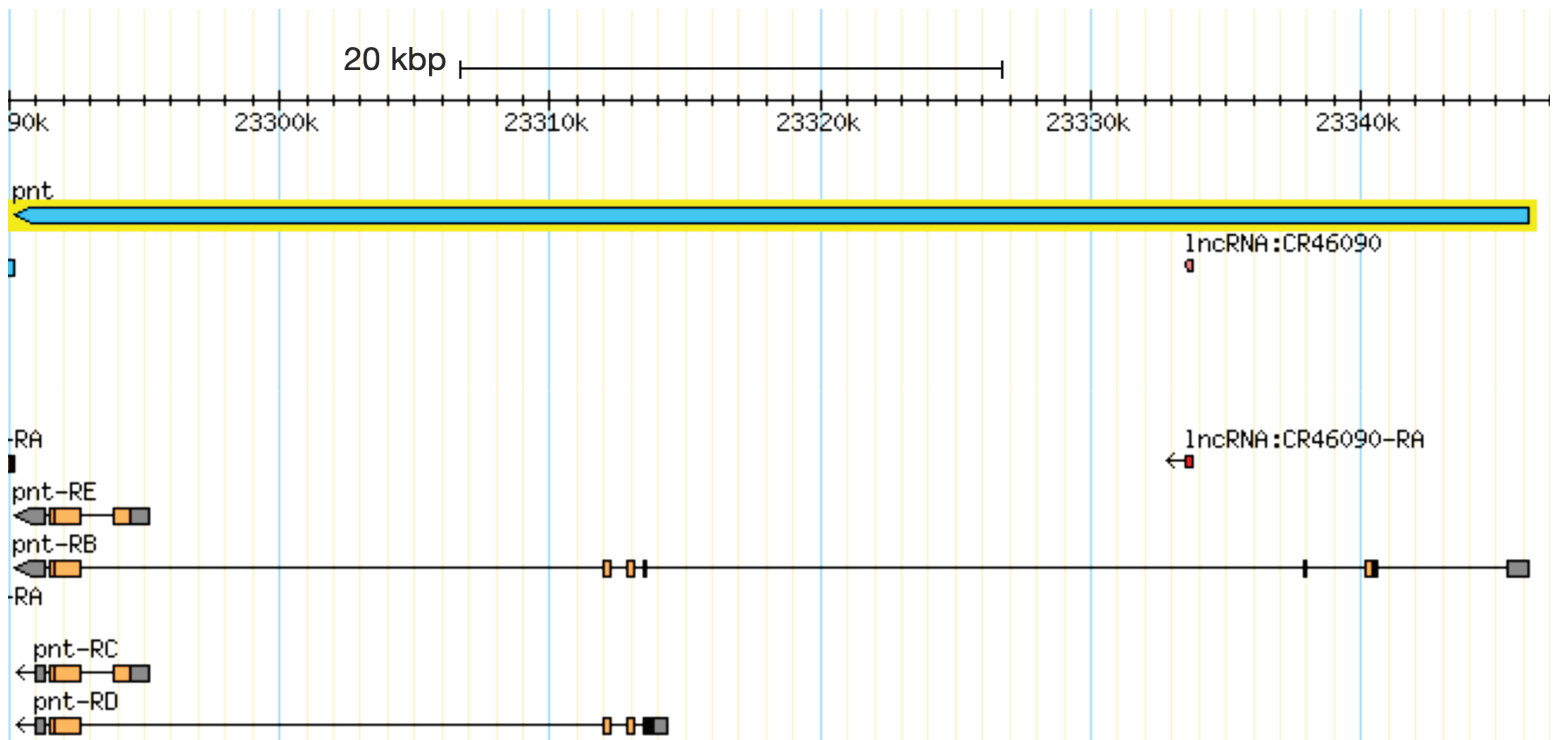**B**

|                   |                                                                |     |
|-------------------|----------------------------------------------------------------|-----|
| P2_Dananassae     | MELAICKTDLSATKFMLPPALPASAAIGTTSAAAATVSSHSHSTAAAAQLAFLDKAAH     | 60  |
| * P2_Dmel         | MELAICKTDLSATKFMLPPALPSSAAIGSSSAVAST-----ASHFLDKAAH            | 46  |
| P2_Dyakuba        | MELAICKTDLSATKFMLPPALPTSATIGSTSAVAST-----ASHFLGKATH            | 46  |
| P2_Dpseudoobscura | MELAICKTDLSATKFMLPPPALPPQATAIATGGPDHSASSVA-----QFSF-HHNLN      | 51  |
| **P2_Dvirilis     | MEVAICKTDLSATKFMLPPALPAAAAIATTTTATA-TTH-SF-----LDR-AVHFN       | 47  |
| P2_Dmojavensis    | MELAICKTDLSATKFMLPPALPAAAAIATTTTATATATH-SF-----LDR-AAQIN       | 48  |
| P2_Dananassae     | ELFNINAINGHLFKPPSHHTNSSNSA-----ANSSSQASTMRLKKNRKVTF            | 107 |
| * P2_Dmel         | ELFQLNAINGHLFKSPASSHLNSVGSP-SILSQLNGIGNSGNHSGQVSTMRLKKNRKVTF   | 105 |
| P2_Dyakuba        | EFIHLNAINGHLFKSPATNHNSLGSPQSILSQLNGIGNSSSHSGQVSTMRLKKNRKVTF    | 106 |
| P2_Dpseudoobscura | ELFNGFS-H---NTLCH-----NSTFSIHPSVVP SILNSNNTTSMRLKKNRKVTF       | 98  |
| **P2_Dvirilis     | ELLNFA-GQHLFKTSCN-----PSSFLNNS--SSSSNCSSSSSNMRLKKNRKVTF        | 96  |
| P2_Dmojavensis    | ELFNFP-GQHLFKTNN-----SFLNNS--NSSS--NSSSNMRLKKNRKVTF            | 91  |
| P2_Dananassae     | LSSIVESKTIKFIKEEPIHGCKDLPPPICSLSDISDHEASIDVPTALPPLTPGTNRKVNVEV | 167 |
| * P2_Dmel         | LSSLVESKNIFIKEEPIHGCKD----LCSLSDISDHEASIEVPTALPPLTPGTNRKVNVEV  | 161 |
| P2_Dyakuba        | LSSLVESKNIFIKEEPIHGCKD----LCSLSDISDQEASIEVPTTLPPLTPGTNRKVNVEV  | 162 |
| P2_Dpseudoobscura | LSSLVESKNIFIKEEPIHGCKDL-----SDISDHEASIDVPTALPPLTPGTNRKVNVEV    | 151 |
| **P2_Dvirilis     | LSSLVESTTKYIKEEPVGCKDLT--VCSLSDISDHEASIDVPTTLPPLTPGTNRKVNVEV   | 154 |
| P2_Dmojavensis    | LSSIVESTTKYIKEEPVGCKDLP--VCSLSDISDHEASIDVPTALPPLTPGTNRKVNVEV   | 149 |

**C**

|                   |                                                               |     |
|-------------------|---------------------------------------------------------------|-----|
| P3_Dananassae     | MTNEWIDWNSRMLPPLRSANYNHHP-----STFLNPNYHSFSSKF                 | 41  |
| * P3_Dmel         | MTNEWIDWNSRMLPPLRSANYNYHP-----QTFLPNNYQCF TGKF                | 41  |
| P3_Dyakuba        | MTNEWIDWNSRMLPPLRSANYNHHP-----QTFLPNNYQCF TGKF                | 41  |
| P3_Dpseudoobscura | MTNEWIDWSDSRMLPPLRSAHYNHSHHHHQTLLQNCNNSSSNNNNNNNNSYHSFSSKF    | 60  |
| **P3_Dvirilis     | MTNEWIDWNSRMLPPLRSANYNTNNNNNSNSNINSNQSNYNNNHQTFLSNYQCLTSKF    | 60  |
| P3_Dmojavensis    | MTNEWIDWNSRMLPPLRSANYNSNSNN-----NNNNYNNNHQTILSNYSQSLTSKF      | 52  |
| P3_Dananassae     | HLKAQKLQQLSTNHHPKLDVPTALPPLTPGTNRKVNVEVLKASFASWEKEVQNCNITKDP  | 101 |
| * P3_Dmel         | HLKGQKLQQLTTNHS-KLKEVPTALPPLTPGTNRKVNVEVLKASFASWEKEVQKCNITKDP | 100 |
| P3_Dyakuba        | HLKGQKLQQLTTNHS-KLKEVPTTLPPLTPGTNRKVNVEVLKASFASWEKEVQKCNITKDP | 100 |
| P3_Dpseudoobscura | HLKAHKLQQLSTNHS-RLKDVPTALPPLTPGTNRKVNVEVLKASFASWEKEVQKYNITKDP | 119 |
| **P3_Dvirilis     | HLKAHKLQQLHTSNG-RLRDVPTTLPPLTPGTNRKVNVEVLKASFASWEKEVQNCNITKDP | 119 |
| P3_Dmojavensis    | HLKAHKLQQLHTSNG-KLRDVPTALPPLTPGTNRKVNVEVLKASFASWEKEVQNCNITKDP | 111 |
