# Supplementary material for: A context-dependent bifurcation in the Pointed transcriptional effector network contributes specificity and robustness to retinal cell fate acquisition
Source: PubMed Central journal article supplement (PMC7728396; doi:10.1371/journal.pgen.1009216), 2020-11-30
Supplement: pgen.1009216.s003.pdf [file pgen.1009216.s003.pdf]

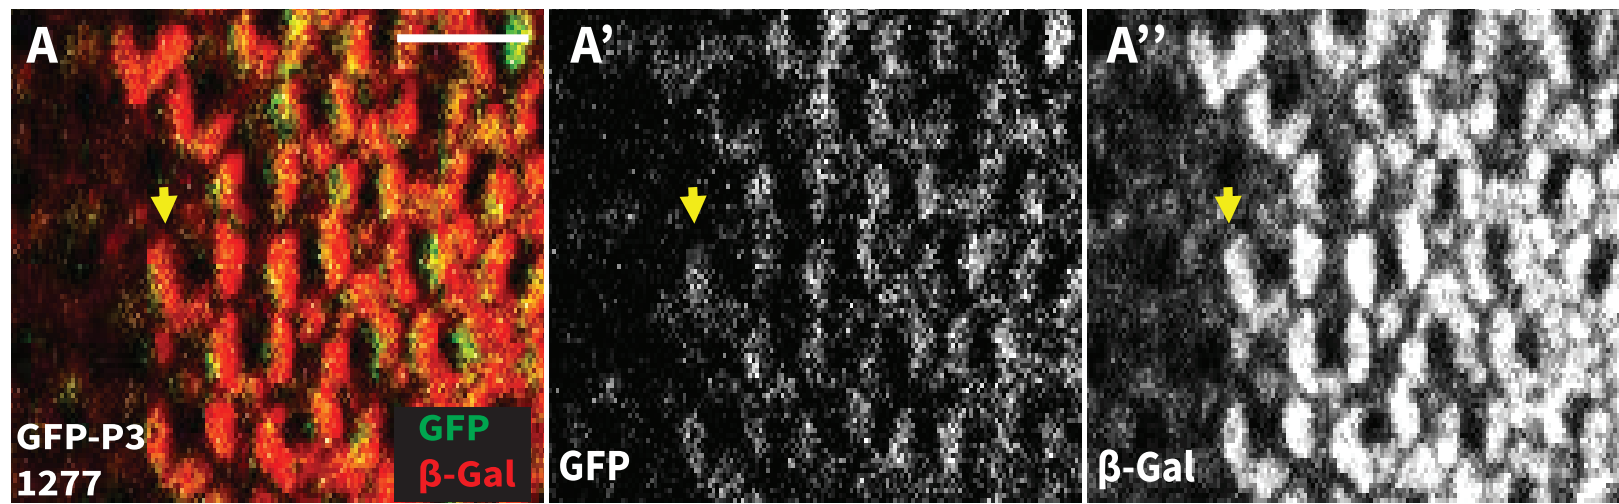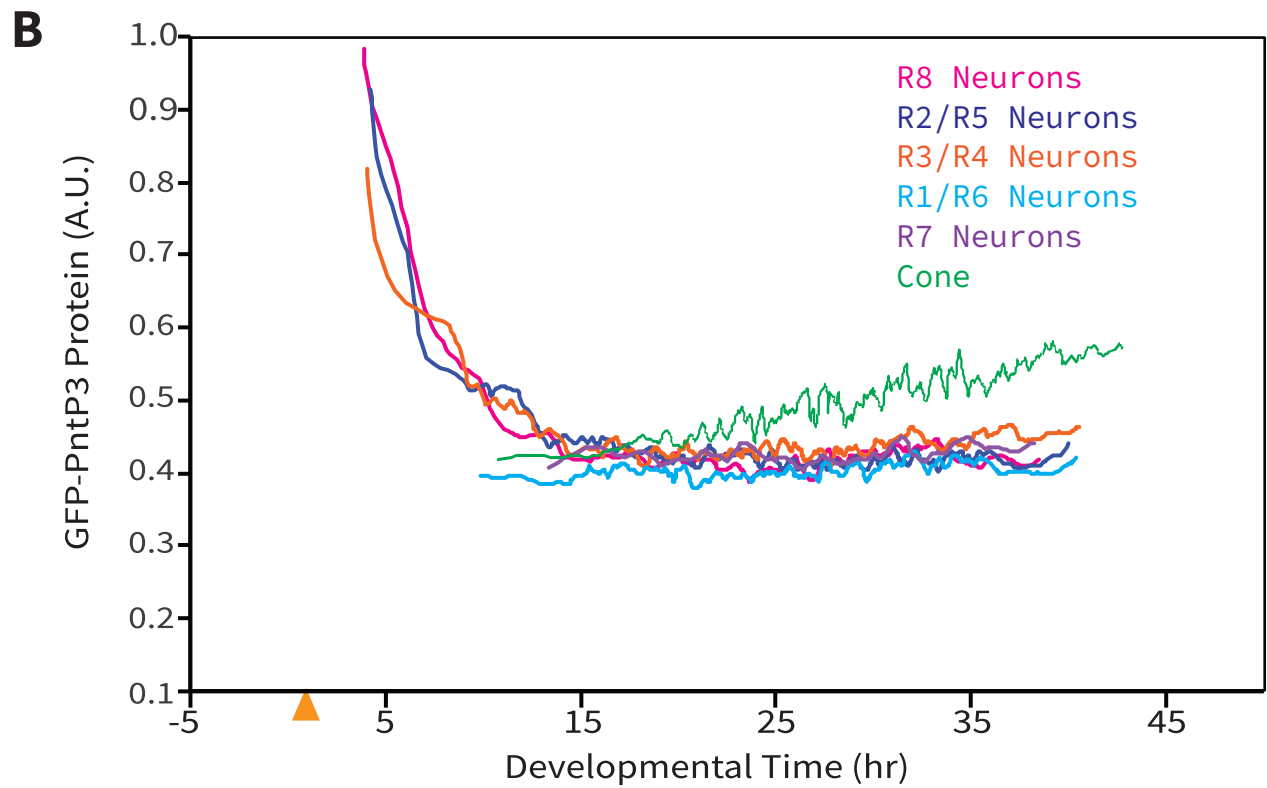

References

1. Nicolás Peláez, Arnau Gavaldà-Miralles, Bao Wang, Heliodoro Tejedor Navarro, Herman Gudjonson, Ilaria Rebay, Aaron R Dinner, Aggelos K Katsaggelos, Luis AN Amaral RWC. Dynamics and heterogeneity of a fate determinant during transition towards cell differentiation. *Elife*. 2015;53: 160. doi:10.1017/CBO9781107415324.004
