# Supplementary material for: A context-dependent bifurcation in the Pointed transcriptional effector network contributes specificity and robustness to retinal cell fate acquisition
Source: PubMed Central journal article supplement (PMC7728396; doi:10.1371/journal.pgen.1009216), 2020-11-30

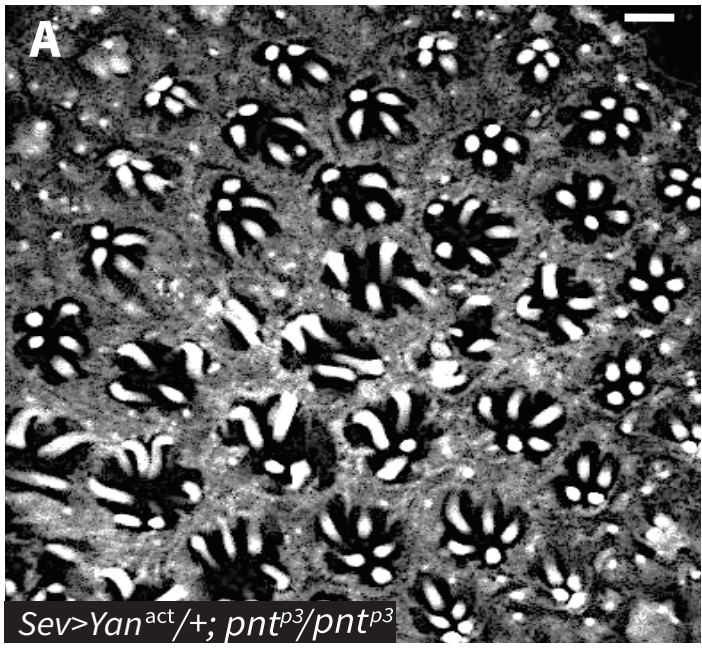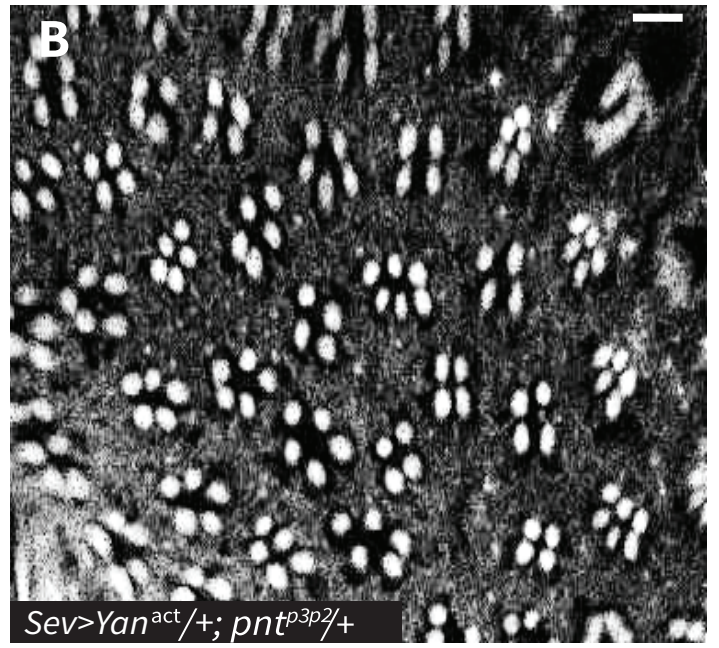

Supplement: pgen.1009216.s008.pdf [file pgen.1009216.s008.pdf]
